# Supplementary material for: Severe osteomalacia with multiple insufficiency fractures secondary to intravenous iron therapy in a patient with Rendu-Osler-Weber syndrome
Source: PubMed Central journal article supplement — Bone Rep. 2020 Aug 22;13:100712. doi: 10.1016/j.bonr.2020.100712 (PMC7475229; doi:10.1016/j.bonr.2020.100712), 2020-08-22
Supplement: mmc1.pdf [file mmc1.pdf]

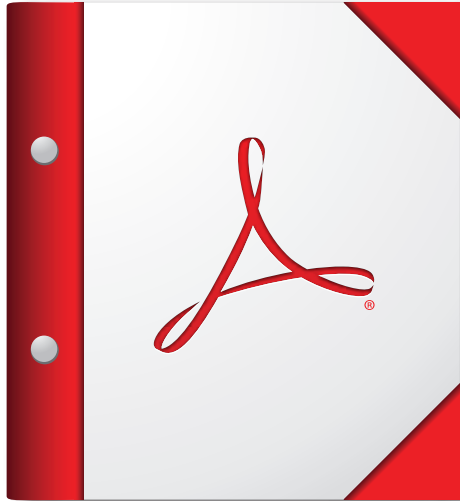

**For the best experience, open this PDF portfolio in  
Acrobat X or Adobe Reader X, or later.**

[Get Adobe Reader Now!](#)
